# Supplementary material
Source: PubMed Central journal article supplement (PMC2846062)
Supplement: JCI41376sd.pdf [file JCI41376sd.pdf]

**Supplemental Table 1. Characteristics of the three groups of mice used in the present adult-onset calorie-restriction study recorded at 24-months of age.**

|                                                       | Young mice   | Aged+AL mice                       | Aged+CR mice             |
|-------------------------------------------------------|--------------|------------------------------------|--------------------------|
| Number of animals (at study entry)                    | 8            | 10                                 | 10                       |
| Number of deaths<br>(during 12 months of observation) | -            | 3                                  | 1                        |
| Causes of death                                       | -            | Neoplasia (n=2)<br>Cirrhosis (n=1) | Neoplasia (n=1)          |
| Body weight (g)                                       | 25.8 ± 1.2   | 35.4 ± 6.4 <sup>a,c</sup>          | 20.0 ± 0.6 <sup>b</sup>  |
| Blood glucose (mg/dl)                                 | 120.4 ± 35.4 | 120.0 ± 26.6 <sup>c</sup>          | 42.6 ± 12.6 <sup>a</sup> |
| Insulin (ng/ml)                                       | 0.50 ± 0.14  | 1.29 ± 0.27 <sup>a,c</sup>         | 0.08 ± 0.01              |
| Free fatty acid (mEq/l)                               | 1.30 ± 0.18  | 0.93 ± 0.20                        | 0.63 ± 0.03 <sup>b</sup> |
| Triglyceride (mg/dl)                                  | 59.2 ± 5.2   | 57.3 ± 13.4 <sup>d</sup>           | 24.6 ± 2.2 <sup>a</sup>  |
| Cholesterol (mg/dl)                                   | 113.9 ± 5.1  | 183.4 ± 19.3 <sup>a,c</sup>        | 90.8 ± 8.6               |
| Adiponectin (µg/ml)                                   | 4.08 ± 0.15  | 4.09 ± 0.41 <sup>d</sup>           | 5.22 ± 0.23 <sup>b</sup> |
| TNFα (pg/ml)                                          | 46.5 ± 2.1   | 92.2 ± 8.4 <sup>a,c</sup>          | 47.6 ± 2.4               |
| Hematocrit (%)                                        | 45.4 ± 0.5   | 40.1 ± 1.3 <sup>b</sup>            | 41.8 ± 0.6 <sup>a</sup>  |
| Left kidney weight (mg)                               | 133.3 ± 3.8  | 186.6 ± 9.8 <sup>a,c</sup>         | 97.2 ± 10.9 <sup>a</sup> |
| Systolic blood pressure (mmHg)                        | 112.3 ± 3.3  | 126.4 ± 1.7 <sup>b,c</sup>         | 101.4 ± 2.2 <sup>b</sup> |

Data are mean ± SEM.

<sup>a</sup>*p* < 0.01 vs Young mice, <sup>b</sup>*p* < 0.05 vs Young mice,

<sup>c</sup>*p* < 0.01 vs Aged+CR mice, <sup>d</sup>*p* < 0.05 vs Aged+CR mice

Young group (n=8), Aged+AL group (n=7), Aged+CR group (n=9).  
AL, ad libitum; CR, calorie restriction.

**Supplemental Table 2. Characteristics of three groups of mice used in the present study of calorie-restriction/*SIRT1*<sup>+/-</sup> mice at 12-months of age.**

|                                                  | WT+AL mice      | <i>SIRT1</i> <sup>+/-</sup> +AL mice | <i>SIRT1</i> <sup>+/-</sup> +CR mice |
|--------------------------------------------------|-----------------|--------------------------------------|--------------------------------------|
| Number of animals (at study entry)               | 6               | 10                                   | 10                                   |
| Number of death (during 6 months of observation) | 1               | 3                                    | 3                                    |
| Cause of death                                   | Neoplasia (n=1) | Neoplasia (n=3)                      | Neoplasia (n=3)                      |
| Body weight (g)                                  | 28.9 ± 1.8      | 26.9 ± 2.7                           | 23.7 ± 0.8 <sup>a</sup>              |
| Blood glucose (mg/dl)                            | 123.4 ± 34.1    | 128.0 ± 16.3                         | 62.6 ± 8.6 <sup>a</sup>              |
| Insulin (ng/ml)                                  | 0.54 ± 0.34     | 0.76 ± 0.27                          | 0.11 ± 0.07 <sup>a</sup>             |

Data are mean ± SEM.

<sup>a</sup>*p* < 0.05 vs the other groups of mice

WT group (n=5), *SIRT1*<sup>+/-</sup>+AL group (n=7), *SIRT1*<sup>+/-</sup>+CR group (n=7).  
AL, ad libitum; CR, calorie restriction.

**Supplemental Table 3. Sequences of primers used in real-time PCR.**

|                                                                                 | Accession    | Forward                                     | Reverse                                      |
|---------------------------------------------------------------------------------|--------------|---------------------------------------------|----------------------------------------------|
| Primers for real-time PCR analysis                                              |              |                                             |                                              |
| 18S                                                                             | NR_003278    | 5'-Ttccgataacgaacgagactct-3'                | 5'-tggctgaacgccacttgtc-3'                    |
| Sirt1                                                                           | NM_019812    | 5'-agaaccaccaaagcggaaaa-3'                  | 5'-aatcccacaggagacagaaacc-3'                 |
| LC3                                                                             | NM_025735    | 5'-aggccttctctctgctggtc-3'                  | 5'-ccgtcttcctctctctctgtt-3'                  |
| beclin1                                                                         | NM_019584    | 5'-tgcaggtgagcttcgtgtg-3'                   | 5'-ctgggctgtggtaagtaaggag-3'                 |
| Atg12                                                                           | NM_026217    | 5'-aacaagaatgggctgtggag-3'                  | 5'-tctggggaaggggcaaa-3'                      |
| Atg5                                                                            | NM_053069    | 5'-gagcggccttccatcca-3'                     | 5'-cctggctcctcttctcca-3'                     |
| Bnip3                                                                           | NM_009760    | 5'-cagcatgaatctggacgaagtag-3'               | 5'-tgttggtatcttgggtgtctgg-3'                 |
| Lamp2                                                                           | NM_001017959 | 5'-aagacaactcctgtgccata-3'                  | 5'-gaccaataaaataagccagcaac-3'                |
| Cln3                                                                            | NM_009907    | 5'-gggtttctggatcttgggtct-3'                 | 5'-gttggtgggtgtgggtgtt-3'                    |
| Rab7                                                                            | NM_009005    | 5'-ggacacagccggtcaagaa-3'                   | 5'-catcaaacaccagaacacagca-3'                 |
| Primers for detection of point mutations in cytochrome b gene                   |              |                                             |                                              |
| Cytb                                                                            | YP_001686710 | 5'-catcgttgaattcaactgcag-3'                 | 5'-caagaccagagtaattgtttatac-3'               |
| Primers for detection of D-17 mutations in mitochondrial DNA with real-time PCR |              |                                             |                                              |
| D-17                                                                            | YP_001686710 | 5'-tcatgaccaatgaactctg-3'                   | 5'-aggctcgcggactagtatat-3'                   |
| Cytb                                                                            | YP_001686710 | 5'-tcgcttccacttcatcttac-3'                  | 5'-atcctgttctgaggaggaag-3'                   |
| Primers for ChIP analysis                                                       |              |                                             |                                              |
| HRE (Bnip3 promoter)                                                            |              | 5'-cctagctagccggctccacttctgcatt<br>agacc-3' | 5'-cggaggatcttgcgccctcagttctg<br>aggccagg-3' |
| FHRE (Bnip3 promoter)                                                           |              | 5'-acttgcatgtgcaaggccct-3'                  | 5'-agaagctatcttagtagcag-3'                   |
| FHRE (p27kip1 promoter)                                                         |              | 5'-acacacacatcctggcaaaag-3'                 | 5'-agtgtcccaaagaagcatgg-3'                   |
| FHRE (Bim promoter)                                                             |              | 5'-gggcgggtacattctgagt-3'                   | 5'-caggctgcgacaggtagt-3'                     |

## Supplemental Figure 1

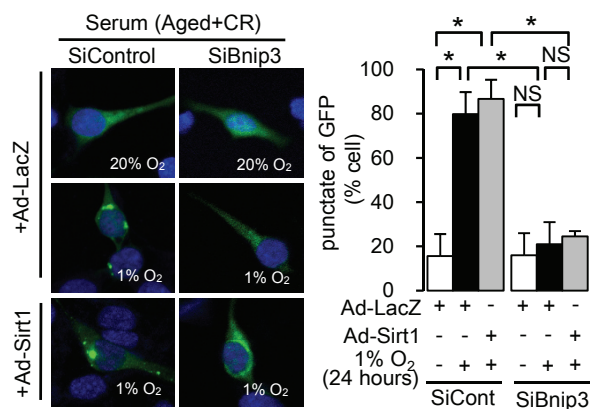

**Supplemental Figure 1. Role of Sirt1-Bnip3 interaction in hypoxia-induced autophagy under CR serum.** Determination of hypoxia (1% O<sub>2</sub>, 24 h)-induced autophagy in control and Bnip3-knockdown cells infected with either adenoviral SIRT1 or LacZ under CR serum. Data are mean ± SEM. \*p<0.05. NS: no significant difference. CR: calorie restriction.

## Supplemental Figure 2

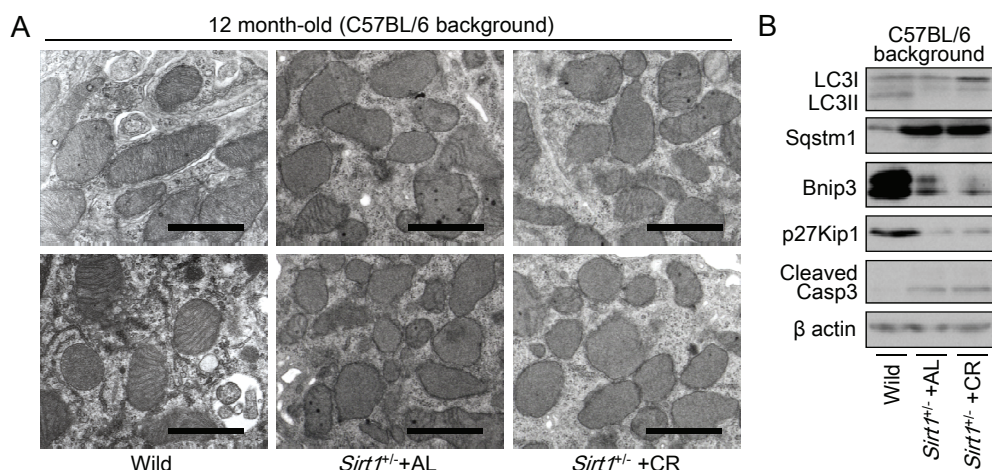

**Supplemental Figure 2. Effect of calorie restriction (CR) on cell adaptation in the kidney of aged *Sirt1*<sup>+/-</sup> mice of C57BL/6 background.** (A) Electron micrographs of renal proximal tubular cells. Scale bars: 1  $\mu$ m. (B) LC3II formation and expression levels of Sqstm1, Bnip3, p27Kip1 and cleaved caspase 3 in the kidney. Wild, 12-month-old wild type mice; *Sirt1*<sup>+/-</sup>+AL: 12-month-old *Sirt1*<sup>+/-</sup> mice fed ad libitum; *Sirt1*<sup>+/-</sup>+CR, 12-month-old *Sirt1*<sup>+/-</sup> mice on CR for 6 months. To generate *Sirt1*<sup>+/-</sup> mice on C57BL/6 background, *Sirt1*<sup>+/-</sup> mice were backcrossed with wild type C57BL/6 mice for more than seven generations. Male *Sirt1*<sup>+/-</sup> mice and their WT littermates on C57BL/6 background were provided food and water ad libitum for first 6 months. At 6 months of age, they were divided into three groups, WT mice with AL, *Sirt1*<sup>+/-</sup> mice with AL and *Sirt1*<sup>+/-</sup> mice with CR, and were followed for next 6 months. At the 12 months of age, these mice were finally sacrificed and their kidney phenotypes were analyzed.
